# Supplementary material for: Variability of δ2H and δ18O in Soil Water and Its Linkage to Precipitation in an East Asian Monsoon Subtropical Forest Plantation
Source: MDPI journal article supplement (doi:10.3390/w13202930), 2021-10-19
Supplement: s1 [file s1]

# Variability in $\delta^2\text{H}$ and $\delta^{18}\text{O}$ of Soil Water and Its Linkage to Precipitation in an East Asian Monsoon Subtropical Forest Plantation

Sidan Lyu <sup>1,\*</sup>

<sup>1</sup> Key Laboratory of Ecosystem Network Observation and Modeling, Institute of Geographic Sciences and Natural Resources Research, Chinese Academy of Sciences, Beijing 100101, China; lvsidan@igsnr.ac.cn

\* Correspondence: lvsidan@igsnr.ac.cn

## Introduction

This supporting information provides the related tables as seen in the main article.

## Contents of Tables

**Table S1.** The slopes (a) and intercepts (b), together with standard deviations (SD) of local meteoric water lines (LMWL), the average Root Mean Sum of Squared Error ( $\text{RMSE}_{\text{av}}$ ) value of the fit, the number of samples (n) and the significance in the difference of each regression to that of OLSR (p-value), when the ordinary least squares regression (OLSR), reduced major axis regression (RMA), major axis regression (MA), and the corresponding precipitation weighted regressions (PWLSR, PWRMA and PWMA) were used, in spring, summer, autumn and winter.

**Table S2.** The  $\delta^2\text{H}$  and  $\delta^{18}\text{O}$  in soil water at 0–5 (SW 0–5), 15–20 (SW 15–20), and 40–45 (SW 40–45) cm depths, and precipitation of different rainfall intensity during winter, spring, summer and autumn.

**Table S3.** The  $\delta^2\text{H}$  and  $\delta^{18}\text{O}$  of soil water source by regression-based approach (Source Obs) and Craig and Gordon model-based approach at 0–5 (Source CG 0–5), 15–20 (Source CG 15–20), and 40–45 (Source CG 40–45) cm depths, and  $\delta^2\text{H}$  and  $\delta^{18}\text{O}$  in precipitation (precipitation amount > 5 mm), during winter, spring, summer and autumn.

**Table S1.** The slopes (a) and intercepts (b), together with standard deviations (SD) of local meteoric water lines (LMWL), the average Root Mean Sum of Squared Error (RMSE<sub>av</sub>) value of the fit, the number of samples (n) and the significance in the difference of each regression to that of OLSR (p-value), when the ordinary least squares regression (OLSR), reduced major axis regression (RMA), major axis regression (MA), and the corresponding precipitation weighted regressions (PWLSR, PWRMA and PWMA) were used, in spring, summer, autumn and winter.

| Methods | a±SD      | b±SD      | RMSE <sub>av</sub> | n   | p-value |
|---------|-----------|-----------|--------------------|-----|---------|
| Spring  |           |           |                    |     |         |
| OLSR    | 7.71±0.20 | 14.0±0.88 | 1.021              | 157 | -       |
| RMA     | 8.11±0.20 | 15.7±0.88 | 1.008              | 157 | 0.165   |
| MA      | 8.52±0.21 | 17.3±0.93 | 1.021              | 157 | 0.006   |
| PWLSR   | 7.81±0.19 | 14.2±0.91 | 1.016              | 157 | 0.742   |
| PWRMA   | 8.19±0.20 | 15.8±0.92 | 1.008              | 157 | 0.103   |
| PWMA    | 8.57±0.20 | 17.4±0.95 | 1.023              | 157 | 0.004   |
| Summer  |           |           |                    |     |         |
| OLSR    | 7.41±0.15 | 5.42±1.26 | 1.011              | 128 | -       |
| RMA     | 7.61±0.15 | 6.99±1.25 | 1.004              | 128 | 0.367   |
| MA      | 7.80±0.15 | 8.54±1.30 | 1.011              | 128 | 0.076   |
| PWLSR   | 7.35±0.17 | 6.12±1.50 | 1.010              | 128 | 0.788   |
| PWRMA   | 7.61±0.17 | 8.24±1.51 | 1.005              | 128 | 0.383   |
| PWMA    | 7.86±0.18 | 10.3±1.55 | 1.019              | 128 | 0.049   |
| Autumn  |           |           |                    |     |         |
| OLSR    | 8.19±0.23 | 15.2±1.72 | 1.012              | 73  | -       |
| RMA     | 8.43±0.23 | 16.9±1.70 | 1.005              | 73  | 0.481   |
| MA      | 8.67±0.24 | 18.5±1.77 | 1.012              | 73  | 0.165   |
| PWLSR   | 8.24±0.19 | 15.7±1.60 | 1.007              | 73  | 0.897   |
| PWRMA   | 8.40±0.19 | 17.0±1.61 | 1.004              | 73  | 0.534   |
| PWMA    | 8.57±0.20 | 18.3±1.64 | 1.009              | 73  | 0.271   |
| Winter  |           |           |                    |     |         |
| OLSR    | 8.68±0.10 | 23.4±0.73 | 1.002              | 82  | -       |
| RMA     | 8.73±0.10 | 23.7±0.72 | 1.001              | 82  | 0.735   |
| MA      | 8.78±0.10 | 24.0±0.74 | 1.002              | 82  | 0.505   |
| PWLSR   | 8.65±0.08 | 23.5±0.67 | 1.003              | 82  | 0.864   |
| PWRMA   | 8.69±0.08 | 23.7±0.67 | 1.001              | 82  | 0.950   |
| PWMA    | 8.72±0.08 | 23.9±0.67 | 1.001              | 82  | 0.771   |

**Table S2.** The weighted average  $\delta^2\text{H}$  and  $\delta^{18}\text{O}$  in soil water at 0-5 (SW 0-5), 15-20 (SW 15-20), and 40-45 (SW 40-45) cm depths, and precipitation of different rainfall intensity during winter, spring, summer and autumn. <sup>a</sup>

| $\delta^2\text{H} \pm \text{SD}$ (‰)    | Winter                  | Spring                  | Summer                  | Autumn                  |
|-----------------------------------------|-------------------------|-------------------------|-------------------------|-------------------------|
| SW 0-5                                  | -42.9 $\pm$ 21.4a (279) | -25.1 $\pm$ 10.3a (308) | -59.8 $\pm$ 13.2b (310) | -53.4 $\pm$ 10.2a (271) |
| SW 15-20                                | -54.4 $\pm$ 19.1b (282) | -26.9 $\pm$ 7.37a (305) | -59.2 $\pm$ 15.4b (313) | -62.8 $\pm$ 7.62b (273) |
| SW 40-45                                | -55.9 $\pm$ 11.7b (282) | -32.9 $\pm$ 7.77b (309) | -49.9 $\pm$ 13.7a (312) | -60.1 $\pm$ 7.05b (270) |
| Precipitation (0-5 mm/day)              | -31.4 $\pm$ 24.7 (165)  | -17.4 $\pm$ 13.5 (255)  | -53.6 $\pm$ 14.3 (186)  | -45.0 $\pm$ 15.2 (196)  |
| Precipitation (5-10 mm/day)             | -33.8 $\pm$ 34.4 (33)   | -17.9 $\pm$ 13.7 (58)   | -53.9 $\pm$ 16.9 (35)   | -45.5 $\pm$ 16.5 (20)   |
| Precipitation (10-20 mm/day)            | -37.5 $\pm$ 39.0 (28)   | -18.2 $\pm$ 13.6 (51)   | -54.2 $\pm$ 17.6 (40)   | -46.8 $\pm$ 17.1 (25)   |
| Precipitation (20-30 mm/day)            | -40.0 $\pm$ 44.7 (10)   | -19.3 $\pm$ 14.6 (18)   | -54.7 $\pm$ 16.1 (19)   | -50.3 $\pm$ 15.8 (10)   |
| Precipitation (30-40 mm/day)            | -39.5 $\pm$ 35.3 (6)    | -21.2 $\pm$ 16.1 (15)   | -55.5 $\pm$ 15.6 (9)    | -49.1 $\pm$ 16.4 (5)    |
| Precipitation (>40 mm/day)              | -35.0 $\pm$ 43.0 (5)    | -25.3 $\pm$ 15.5 (15)   | -55.5 $\pm$ 16.7 (25)   | -51.1 $\pm$ 16.8 (13)   |
| $\delta^{18}\text{O} \pm \text{SD}$ (‰) | Winter                  | Spring                  | Summer                  | Autumn                  |
| SW 0-5                                  | -6.00 $\pm$ 2.42a       | -4.37 $\pm$ 1.35a       | -7.94 $\pm$ 1.70b       | -6.61 $\pm$ 1.62a       |
| SW 15-20                                | -7.83 $\pm$ 2.21b       | -4.62 $\pm$ 0.94a       | -8.13 $\pm$ 1.89b       | -8.38 $\pm$ 0.94b       |
| SW 40-45                                | -8.02 $\pm$ 1.41b       | -5.40 $\pm$ 0.98b       | -7.20 $\pm$ 1.69a       | -8.15 $\pm$ 0.96b       |
| Precipitation (0-5 mm/day)              | -6.34 $\pm$ 2.87        | -4.04 $\pm$ 1.67        | -8.15 $\pm$ 1.87        | -7.40 $\pm$ 1.78        |
| Precipitation (5-10 mm/day)             | -6.63 $\pm$ 3.94        | -4.11 $\pm$ 1.70        | -8.21 $\pm$ 2.24        | -7.46 $\pm$ 1.94        |
| Precipitation (10-20 mm/day)            | -7.07 $\pm$ 4.46        | -4.15 $\pm$ 1.68        | -8.27 $\pm$ 2.34        | -7.63 $\pm$ 2.04        |
| Precipitation (20-30 mm/day)            | -7.32 $\pm$ 5.17        | -4.28 $\pm$ 1.78        | -8.37 $\pm$ 2.21        | -8.05 $\pm$ 1.85        |
| Precipitation (30-40 mm/day)            | -7.25 $\pm$ 4.19        | -4.45 $\pm$ 1.99        | -8.50 $\pm$ 2.12        | -7.89 $\pm$ 1.99        |
| Precipitation (>40 mm/day)              | -6.74 $\pm$ 5.14        | -4.91 $\pm$ 1.96        | -8.57 $\pm$ 2.30        | -8.16 $\pm$ 2.08        |

<sup>a</sup> SD means standard deviation; the different lower case letters indicate significant differences according to the post hoc Tukey test at  $\alpha = 0.05$ . Number in the parentheses are the number of samples, and the number of samples of  $\delta^{18}\text{O}$  was the same as those of  $\delta^2\text{H}$  for each type of samples, and thus they were omitted.

**Table S3.** The  $\delta^2\text{H}$  and  $\delta^{18}\text{O}$  of soil water source by regression-based approach (Source Obs) and Craig and Gordon model-based approach at 0-5 (Source CG 0-5), 15-20 (Source CG 15-20), and 40-45 (Source CG 40-45) cm depths, and  $\delta^2\text{H}$  and  $\delta^{18}\text{O}$  in precipitation (precipitation amount > 5 mm), during winter, spring, summer and autumn. <sup>a</sup>

| $\delta^2\text{H} \pm \text{SD}$ (‰)    | Winter             | Spring            | Summer            | Autumn             |
|-----------------------------------------|--------------------|-------------------|-------------------|--------------------|
| Source obs                              | -79.8 $\pm$ 40.4c  | -69.3 $\pm$ 43.4b | -98.3 $\pm$ 44.5c | -88.5 $\pm$ 24.9b  |
| Source CG 0-5                           | -48.5 $\pm$ 22.4a  | -34.2 $\pm$ 12.4a | -78.9 $\pm$ 19.4b | -77.3 $\pm$ 17.0a  |
| Source CG 15-20                         | -57.7 $\pm$ 18.4ab | -33.5 $\pm$ 8.71a | -74.8 $\pm$ 20.3b | -87.6 $\pm$ 13.6b  |
| Source CG 40-45                         | -66.0 $\pm$ 17.1b  | -38.3 $\pm$ 9.54a | -59.5 $\pm$ 17.2a | -84.6 $\pm$ 11.3ab |
| Precipitation (P>5 mm)                  | -33.8 $\pm$ 34.4   | -17.9 $\pm$ 13.7  | -53.9 $\pm$ 16.9  | -45.5 $\pm$ 16.5   |
| $\delta^{18}\text{O} \pm \text{SD}$ (‰) | Winter             | Spring            | Summer            | Autumn             |
| Source obs                              | -11.4 $\pm$ 4.72c  | -10.2 $\pm$ 5.08b | -13.6 $\pm$ 5.21c | -12.4 $\pm$ 2.92b  |
| Source CG 0-5                           | -7.77 $\pm$ 2.64a  | -6.11 $\pm$ 1.46a | -11.3 $\pm$ 2.26b | -11.1 $\pm$ 2.02a  |
| Source CG 15-20                         | -8.86 $\pm$ 2.16ab | -6.02 $\pm$ 1.04a | -10.8 $\pm$ 2.43b | -12.3 $\pm$ 1.59b  |
| Source CG 40-45                         | -9.82 $\pm$ 2.00b  | -6.59 $\pm$ 1.11a | -9.04 $\pm$ 2.05a | -11.9 $\pm$ 1.42ab |
| Precipitation (P>5 mm)                  | -6.63 $\pm$ 3.94   | -4.11 $\pm$ 1.70  | -8.21 $\pm$ 2.24  | -7.46 $\pm$ 1.94   |

<sup>a</sup> SD means standard deviation; the different lower case letters indicate significant differences according to the post hoc Tukey test at  $\alpha = 0.05$ .
